# Supplementary material
Source: MDPI journal article supplement (https://www.mdpi.com/1999-4907/12/7/822)
Supplement: s1 [file s1]

## Supplementary materials

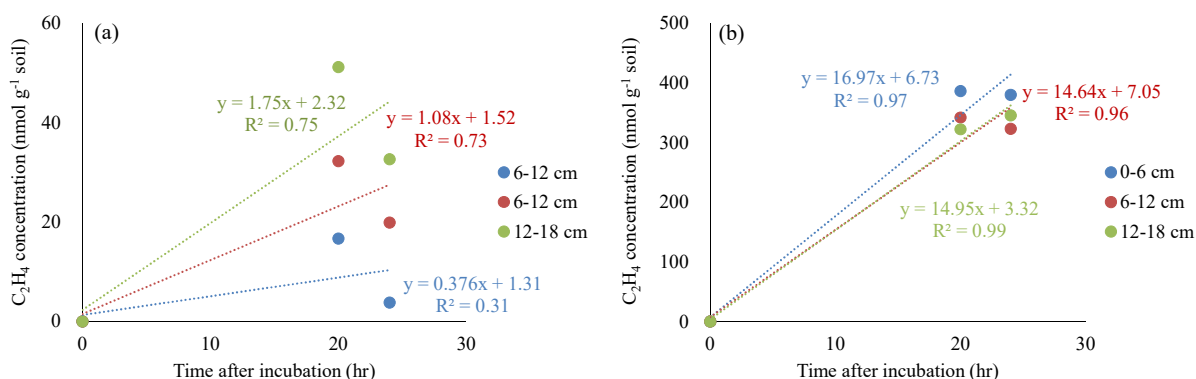

**Figure S1.** The changes in  $C_2H_4$  concentrations and the linear regressions in the Guandu (a) and Bali (b) mangrove forest soils.

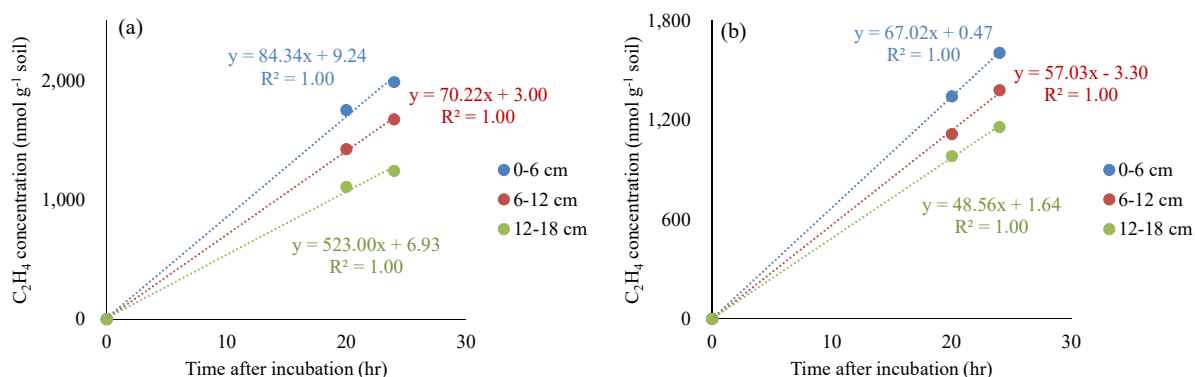

**Figure S2.** The changes in  $C_2H_4$  concentrations and the linear regressions in the Guandu (a) and Bali (b) mangrove forest soils with amended glucose solution (5 ml; 20 mM).

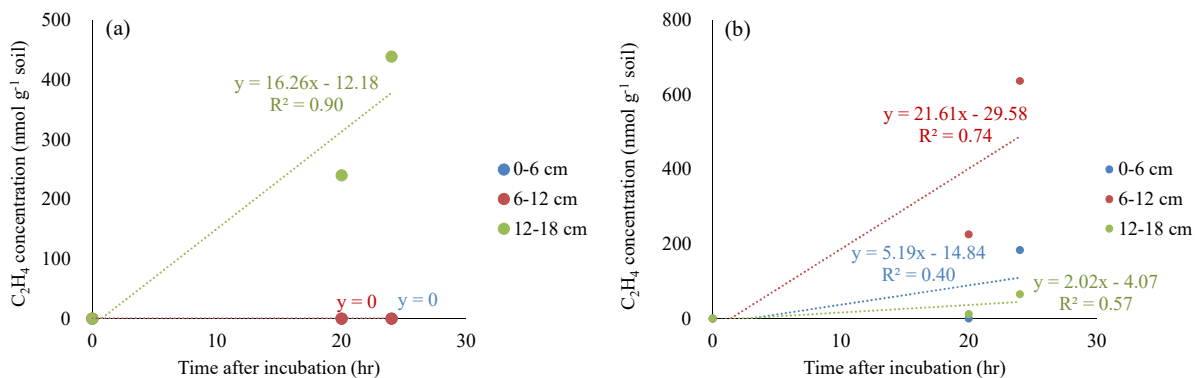

**Figure S3.** The changes in  $C_2H_4$  concentrations and the linear regressions in the Guandu (a) and Bali (b) mangrove forest soils with amended  $MoO_4$  (1 ml; 20 mM) and glucose solution (5 ml; 20 mM).
